# Supplementary material
Source: PubMed Central journal article supplement (PMC2852472)

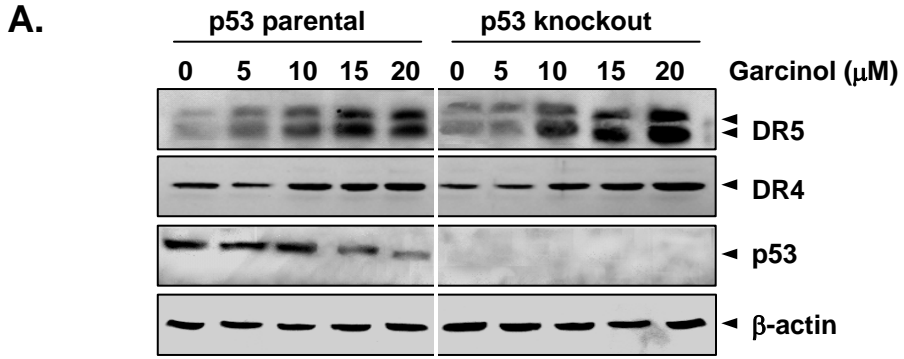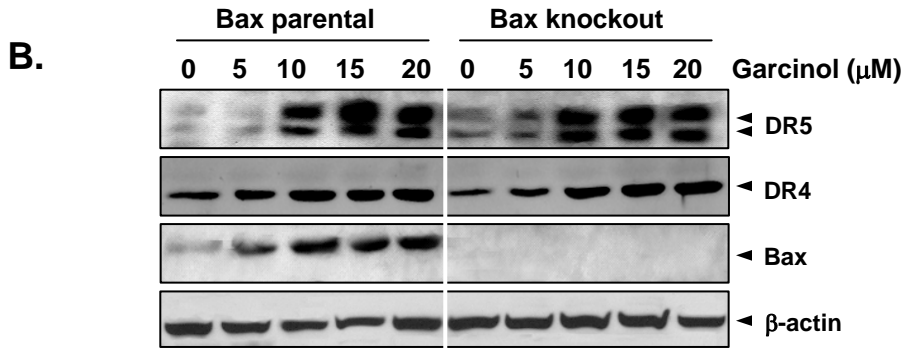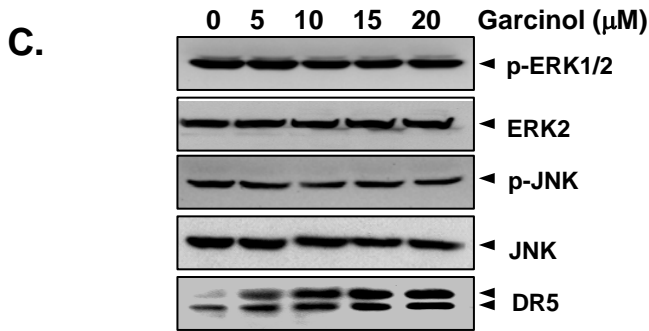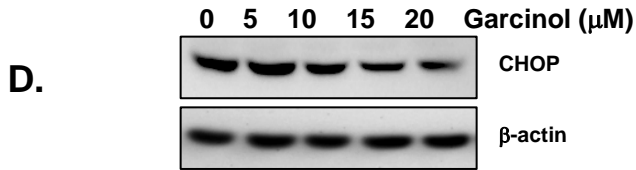

Supplement: NIHMS181321-supplement-2.pdf [file NIHMS181321-supplement-2.pdf]
